# Supplementary material
Source: PubMed Central journal article supplement (PMC4048016)
Supplement: NIHMS543612-supplement-02.pdf [file NIHMS543612-supplement-02.pdf]

Note. Positive values indicate more frequent substance use, gambling and related problems. Gender: male coded 1, female coded 0; race: white coded 1, non-white coded 0; ethnicity: Hispanic/Latino(a) coded 1, non-Hispanic/Latino(a) coded 0; activity participation: at least one activity coded 1, no activities coded 0; part-time job coded 1, no job coded 0. Significant correlations at  $p < .01$  indicated in bold.

ACCEPTED MANUSCRIPT
